# Supplementary material for: Sources and trends of trace elements and polycyclic aromatic hydrocarbons in a shallow lake in the Mediterranean area from sediment archives of the Anthropocene
Source: PubMed Central journal article supplement (PMC9668802; doi:10.1007/s11356-022-22939-4), 2022-09-20
Supplement: 11356_2022_22939_MOESM1_ESM.pdf [file 11356_2022_22939_MOESM1_ESM.pdf]

Sources and trends of trace elements and  
polycyclic aromatic hydrocarbons in a  
shallow lake in the Mediterranean area from  
sediment archives of the Anthropocene

Paola Gravina<sup>1\*</sup>, Bartolomeo Sebastiani<sup>1</sup>, Federica  
Bruschi<sup>1</sup>, Chiara Petroselli<sup>1</sup>, Beatrice Moroni<sup>1</sup>, Roberta  
Selvaggi<sup>1</sup>, Enzo Goretti<sup>1</sup>, Matteo Pallottini<sup>1</sup>, Alessandro  
Ludovisi<sup>1</sup> and David Cappelletti<sup>1</sup>

<sup>1\*</sup>Department of Chemistry Biology and Biotechnology, University  
of Perugia, via Elce di Sotto 8, Perugia, 60123, Umbria, Italy.

\*Corresponding author(s). E-mail(s): [paolagravi@gmail.com](mailto:paolagravi@gmail.com);  
Contributing authors: [bartolomeo.sebastiani@unipg.it](mailto:bartolomeo.sebastiani@unipg.it);  
[federica.bruschi@studenti.unipg.it](mailto:federica.bruschi@studenti.unipg.it); [petrosellichiaara@gmail.com](mailto:petrosellichiaara@gmail.com);  
[b.moroni@tiscali.it](mailto:b.moroni@tiscali.it); [roberta.selvaggi@unipg.it](mailto:roberta.selvaggi@unipg.it);  
[enzo.goretti@unipg.it](mailto:enzo.goretti@unipg.it); [matteo.pallottini@unipg.it](mailto:matteo.pallottini@unipg.it);  
[alessandro.ludovisi@unipg.it](mailto:alessandro.ludovisi@unipg.it); [david.cappelletti@unipg.it](mailto:david.cappelletti@unipg.it);

**SUPPLEMENTARY MATERIAL**

## 1 Chemical analysis

### 1.1 Major and trace elements

Major and trace elements (Al, Fe, Ti, V, Mn, Co, Ni, Pb, Cr, Cu, Zn and P, and corresponding wavelengths in Table SM1) concentrations were determined by Inductively Coupled Plasma an Optical Emission Spectrometry (ICP-OES, Ultima 2, HORIBA Scientific) equipped with an ultrasonic nebulizer (CETAC Technologies, U-5000AT). The sediment samples were first dried at 105 °C for 24 h, then an aliquot (0.250 g) was digested with 8 ml of ultrapure HNO<sub>3</sub> (65-69%) and 2 ml of ultrapure H<sub>2</sub>O<sub>2</sub> (30-32%). The acid digestion was performed in a Mars Microwave Oven, with 2 working steps: the first at 130 °C (200 psi) for 1' and the second at 180 °C (300 psi) for 10'. The digestion mixture was finally filtered using 2,5 μm filters (Whatman Grade n 42), and diluted to 50 ml with ultrapure H<sub>2</sub>O (18 MΩ). Quality assurance was provided by determining the elemental concentrations for duplicate samples and one reference material (Certified Reference material SS-1-Contaminated Soil). The recovery of total metal concentration varied between 79 and 130% among the different analytes. The Limit of Detection (LOD) of the methods ranged from 0.01 to 2.95 ppm (Table SM2).

### 1.2 Organic compounds

An amount between about 2 to 4g dry weight of powdered sediment was spiked before extraction with a mix of 13 perdeuterated surrogate homologues as recovery standards (namely naphthalene-d<sub>8</sub>, acenaphthene-d<sub>8</sub>, phenanthrene-d<sub>10</sub>, fluoranthene-d<sub>10</sub>, pyrene-d<sub>10</sub>, chrysene-d<sub>12</sub>, benzo(b)fluoranthene-d<sub>12</sub>, Benzo(a)pyrene-d<sub>12</sub>, perylene-d<sub>12</sub>, debenzo(a,h)anthracene-d<sub>12</sub>, benzo(ghi)perylene-d<sub>12</sub> and dibenzo(a,i)pyrene-d<sub>14</sub>, to monitor recovery method (average recovery >70%). The PAH fractions

28 were extracted twice in dichloromethane (DCM) by ultrasonic agitation at  
29 ambient temperature for 15min. Then, the combined extracts were fraction-  
30 ated by adsorption chromatography on activated silica gel (high-purity grade,  
31 pore size 60 , 70-230 mesh ASTM, Merck, Germany), pre-conditioned overnight  
32 at 120°C. The PAHs were isolated by elution with 20ml of a n-hexane-  
33 dichloromethane solution (4:1 ; v/v) and reduced to small volume. The residues  
34 was resuspended in 80  $\mu$ l for GC-MS analysis. An aliquot of 0.5  $\mu$ l in n-hexane  
35 was analysed using a gas chromatography-mass spectrometry with a triple-axis  
36 detector (HP7890A/5975CVL - Agilent Technologies, USA), equipped with  
37 low bleed Select-PAH capillary column (Agilent J&W, CP 7461), 15mx0,15mm  
38 ID and 0,10 $\mu$ m film thickness.+ 3m EZ-Guard.

39 GC oven programmed conditions were: from 80° (kept 0.8 min.) to 180°C at  
40 70°C/min., to 230°C at 7°C/min. (kept 7 min.), to 280°C at 50°C/min. (kept 7  
41 min.) and to 350°C at 30°C/min. (kept 7 min.) High purity Helium was used as  
42 carrier gas at constant flow rate of 1.2 ml/min and the injector operated under  
43 pulsed splitless mode (50psi for 0.4 min.) at 300°C. The mass detection was  
44 performed in selected ion monitoring (SIM) mode with ion source operating in  
45 electron positive ionisation at a voltage of 70eV and temperature of 230°C. All  
46 the reagents used for the analytical procedure, extraction and clean-up were  
47 analytical grade of highest purity or high performance liquid chromatography  
48 (HPLC) grade ( $\geq$ 99%) and purchased from the Sigma-Aldrich, Deisenhofen,  
49 Germany. The analytical standard of PAHs and their perdeuterated surrogate  
50 homologues were supplied by BCR Certified Reference Material CEE, Lab Ser-  
51 vice Analytica-Dr. Ehrenstorfer GmbH (Italy-Germany) and Neochema GmbH  
52 (Germany). The procedure was defined according to ISTISAN 99/28 (Italian

53 National Health Service, 1999), an extensively consolidated method for qual-  
54 ity assurance and quality control (QA/QC) in analysis of Persistent Organic  
55 Pollutants (POPs) in sediments.

### 56 **1.3 Lead isotope analysis**

57 The determination of  $^{208}\text{Pb}/^{207}\text{Pb}$  and  $^{206}\text{Pb}/^{207}\text{Pb}$  ratios was performed by  
58 an Agilent 8900 ICP-MS/MS (100 version, Agilent Technologies, Japan), oper-  
59 ated in the MS/MS mode. The instrument is equipped with two quadrupole  
60 mass units (Q1 and Q2) and a third generation octopole-based collision/re-  
61 action cell system (CRS) located in-between (Q1-CRC-Q2). A micro mist  
62 nebulizer and a spray chamber kept at 4°C were used for the sample intro-  
63 duction. The CRC was pressurized with a  $\text{NH}_3/\text{He}$  15 % mixture, used as a  
64 damping gas to lower the RSD. Q1 and Q2 were both set on mass  $m/z =$   
65 206, 207 and 208. The integration time for each isotope mass was set to 1 sec-  
66 ond with 4000 sweeps. Internal precision was 0.56% (%RSD,  $n = 10$ ) for the  
67  $^{206}\text{Pb}/^{207}\text{Pb}$  ratio. The instrumental mass bias was corrected with the stan-  
68 dard sample bracketing method using the lead isotopic standard SRM 981  
69 from NIST (Gaithersburg, MD, USA) [Vanhaecke et al \(2009\)](#). More details on  
70 the method are reported in [Bazzano and Grotti \(2014\)](#); [Bazzano et al \(2021\)](#);  
71 [Bertinetti et al \(2022\)](#)).

72 **Acknowledgments.** We thank MIUR and University of Perugia for finan-  
73 cial support through AMIS project (“Dipartimenti di Eccellenza–2018–2022”).

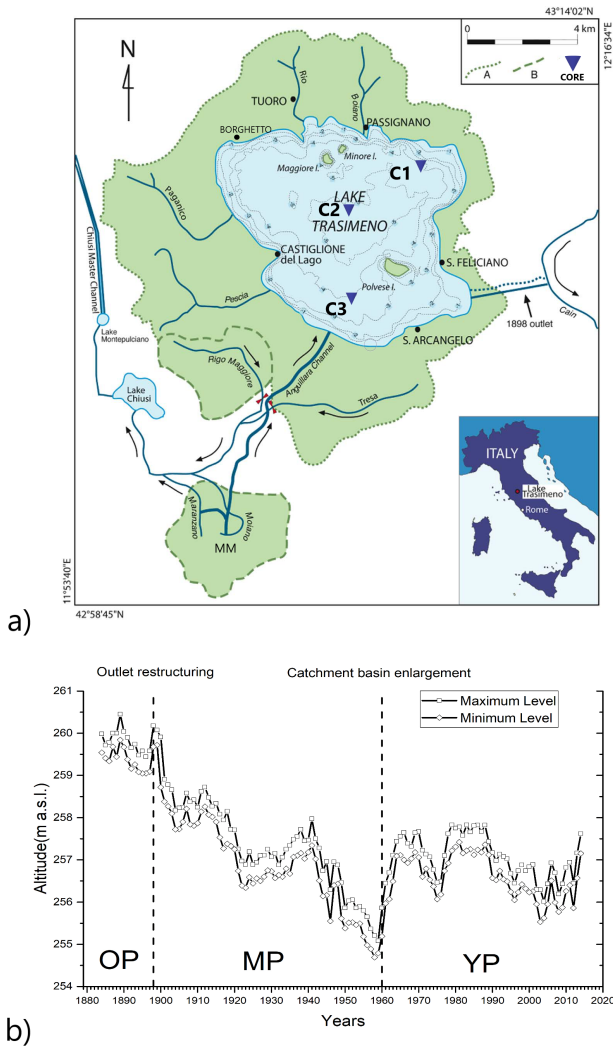

Fig. SM1: *a*) map of the Trasimeno lake with its catchment basin (modified from [Marchegiano et al \(2018\)](#)), A) natural catchment area, B) artificially-joined basins of Rigo Maggiore (RM) and Moiano and Maranzano (MM, is joined to the lake by artificial canal crossing over the natural waterway). The blue triangles mark the location of sampling sites (C1,C2 and C3 cores located at the coordinates N 43°09'40.0" E 12°10'06.0", N 43°08'38" E 12°06'43" and N 43°05'51" E 12°06'38", respectively). *b* shows the trend of water level, with hydrometric phases, old (OP), middle (MP) and young (YP) are indicated.

| Sample | Depth | Dating | Sample | Depth | Dating | Sample | Depth | Dating |
|--------|-------|--------|--------|-------|--------|--------|-------|--------|
| code   | cm    | years  | code   | cm    | years  | code   | cm    | years  |
| C2-1   | 1     | 2007   | C1-1e2 | 1 e 2 | 2006   | C3-1e2 | 1 e 2 | 2003   |
| C2-2   | 2     | 2005   | C1-3   | 3     | 2003   | C3-3   | 3     | 2000   |
| C2-3   | 3     | 2004   | C1-4   | 4     | 2001   | C3-4   | 4     | 1997   |
| C2-4   | 4     | 2003   | C1-5   | 5     | 1999   | C3-5   | 5     | 1994   |
| C2-5   | 5     | 2001   | C1-6   | 6     | 1997   | C3-6   | 6     | 1991   |
| C2-6   | 6     | 2000   | C1-7   | 7     | 1996   | C3-7   | 7     | 1988   |
| C2-7   | 7     | 1999   | C1-8   | 8     | 1994   | C3-8   | 8     | 1985   |
| C2-8   | 8     | 1997   | C1-9   | 9     | 1992   | C3-9   | 9     | 1982   |
| C2-9   | 9     | 1996   | C1-10  | 10    | 1990   | C3-10  | 10    | 1979   |
| C2-10  | 10    | 1994   | C1-11  | 11    | 1989   | C3-11  | 11    | 1976   |
| C2-11  | 11    | 1993   | C1-12  | 12    | 1987   | C3-12  | 12    | 1973   |
| C2-12  | 12    | 1992   | C1-13  | 13    | 1985   | C3-13  | 13    | 1970   |
| C2-13  | 13    | 1990   | C1-14  | 14    | 1984   | C3-14  | 14    | 1967   |
| C2-14  | 14    | 1989   | C1-15  | 15    | 1982   | C3-15  | 15    | 1964   |
| C2-15  | 15    | 1988   | C1-16  | 16    | 1980   | C3-16  | 16    | 1961   |
| C2-16  | 16    | 1986   | C1-17  | 17    | 1978   | C3-17  | 17    | 1958   |
| C2-17  | 17    | 1985   | C1-18  | 18    | 1977   | C3-18  | 18    | 1955   |
| C2-18  | 18    | 1984   | C1-19  | 19    | 1975   | C3-19  | 19    | 1952   |
| C2-19  | 19    | 1982   | C1-20  | 20    | 1973   | C3-20  | 20    | 1949   |
| C2-20  | 20    | 1981   | C1-21  | 21    | 1972   | C3-21  | 21    | 1946   |
| C2-21  | 21    | 1979   | C1-22  | 22    | 1970   | C3-22  | 22    | 1943   |
| C2-22  | 22    | 1978   | C1-23  | 23    | 1968   | C3-23  | 23    | 1940   |
| C2-23  | 23    | 1977   | C1-24  | 24    | 1966   | C3-24  | 24    | 1937   |
| C2-24  | 24    | 1975   | C1-25  | 25    | 1964   | C3-25  | 25    | 1934   |
| C2-25  | 25    | 1974   | C1-26  | 26    | 1962   | C3-26  | 26    | 1931   |
| C2-26  | 26    | 1973   | C1-27  | 27    | 1960   | C3-27  | 27    | 1928   |
| C2-27  | 27    | 1971   | C1-28  | 28    | 1957   | C3-28  | 28    | 1925   |
| C2-28  | 28    | 1970   | C1-29  | 29    | 1956   | C3-29  | 29    | 1922   |
| C2-29  | 29    | 1968   | C1-30  | 30    | 1955   | C3-30  | 30    | 1919   |
| C2-30  | 30    | 1967   | C1-32  | 32    | 1951   | C3-32  | 32    | 1915   |
| C2-32  | 32    | 1965   | C1-34  | 34    | 1948   | C3-34  | 34    | 1909   |
| C2-34  | 34    | 1962   | C1-36  | 36    | 1944   | C3-36  | 36    | 1903   |
| C2-36  | 36    | 1960   | C1-38  | 38    | 1941   | C3-38  | 38    | 1897   |
| C2-38  | 38    | 1957   | C1-40  | 40    | 1937   | C3-40  | 40    | 1891   |
| C2-40  | 40    | 1954   | C1-42  | 42    | 1934   | C3-42  | 42    | 1885   |
| C2-42  | 42    | 1951   | C1-44  | 44    | 1930   | C3-44  | 44    | 1879   |
| C2-44  | 44    | 1949   | C1-46  | 46    | 1927   | C3-46  | 46    | 1873   |
| C2-46  | 46    | 1946   | C1-48  | 48    | 1924   | C3-48  | 48    | 1867   |
| C2-48  | 48    | 1943   | C1-50  | 50    | 1921   | C3-50  | 50    | 1861   |
| C2-50  | 50    | 1940   | C1-52  | 52    | 1918   |        |       |        |
| C2-52  | 52    | 1938   | C1-54  | 54    | 1915   |        |       |        |
| C2-54  | 54    | 1935   | C1-56  | 56    | 1912   |        |       |        |
| C2-56  | 56    | 1932   | C1-58  | 58    | 1909   |        |       |        |
| C2-58  | 58    | 1929   | C1-60  | 60    | 1906   |        |       |        |
| C2-60  | 60    | 1927   | C1-62  | 62    | 1903   |        |       |        |
| C2-62  | 62    | 1924   | C1-64  | 64    | 1900   |        |       |        |
| C2-66  | 66    | 1918   | C1-66  | 66    | 1897   |        |       |        |
| C2-68  | 68    | 1916   | C1-68  | 68    | 1895   |        |       |        |
| C2-70  | 70    | 1913   | C1-70  | 70    | 1892   |        |       |        |
| C2-72  | 72    | 1910   | C1-72  | 72    | 1889   |        |       |        |
| C2-74  | 74    | 1908   | C1-74  | 74    | 1887   |        |       |        |
| C2-76  | 76    | 1905   | C1-76  | 76    | 1884   |        |       |        |
| C2-78  | 78    | 1902   | C1-78  | 78    | 1881   |        |       |        |
| C2-80  | 80    | 1899   | C1-80  | 80    | 1879   |        |       |        |
| C2-82  | 82    | 1897   | C1-82  | 82    | 1876   |        |       |        |
| C2-84  | 84    | 1894   | C1-84  | 84    | 1874   |        |       |        |
| C2-86  | 86    | 1891   | C1-86  | 86    | 1871   |        |       |        |
| C2-88  | 88    | 1888   | C1-88  | 88    | 1868   |        |       |        |
| C2-90  | 90    | 1886   | C1-90  | 90    | 1865   |        |       |        |
| C2-92  | 92    | 1883   | C1-92  | 92    | 1863   |        |       |        |
| C2-94  | 94    | 1880   | C1-95  | 95    | 1859   |        |       |        |
| C2-96  | 96    | 1877   |        |       |        |        |       |        |
| C2-98  | 98    | 1875   |        |       |        |        |       |        |
| C2-100 | 100   | 1872   |        |       |        |        |       |        |
| C2-102 | 102   | 1869   |        |       |        |        |       |        |

Fig. SM2: The table shows the sub-sample lists for all 3 sediment cores. Each sample is associated with: an alphanumeric code, depth to surface and corresponding date.

Table SM1: Measurement wavelengths by ICP-OES.

| Element | $\lambda$ (nm) |
|---------|----------------|
| Zn      | 213,856        |
| P       | 214,914        |
| Ni      | 216,556        |
| Pb      | 220,353        |
| Co      | 228,616        |
| Al      | 237,312        |
| Mn      | 257,61         |
| Fe      | 259,94         |
| V       | 292,402        |
| Cr      | 267,716        |
| Ti      | 323,452        |
| Cu      | 327,396        |

Table SM2: LOD values per element are reported.

| Element | LOD  |      |      |
|---------|------|------|------|
|         | C1   | C2   | C3   |
| Mg      | 2,69 | 1,07 | 2,69 |
| Fe      | 0,12 | 0,22 | 0,12 |
| Al      | 1,01 | 0,12 | 1,01 |
| Ca      | 2,95 | 0,56 | 2,95 |
| K       | 2,63 | 0,32 | 2,63 |
| V       | 0,09 | 0,02 | 0,26 |
| Co      | 0,12 | 0,02 | 0,20 |
| Ni      | 0,09 | 0,03 | 0,10 |
| Pb      | 0,07 | 0,02 | 0,19 |
| Cr      | 0,06 | 0,01 | 0,20 |
| Cu      | 0,04 | 0,01 | 0,37 |
| Ti      | 0,01 | 0,04 | 0,28 |
| Zn      | 0,03 | 0,03 | 0,08 |
| P       | 0,03 | 0,03 | 0,15 |
| Mn      | 0,01 | 0,16 | 0,05 |

## 75 References

- 76 Bazzano A, Grotti M (2014) Determination of lead isotope ratios in envi-  
77 ronmental matrices by quadrupole ICP-MS working at low sample  
78 consumption rates. *Journal of Analytical Atomic Spectrometry* 29(5):926.  
79 doi:<https://doi.org/10.1039/c3ja50388g>
- 80 Bazzano A, Bertinetti S, Ardini F, et al (2021) Potential Source Areas for  
81 Atmospheric Lead Reaching Ny-Ålesund from 2010 to 2018. *Atmosphere*

## 8 REFERENCES

|                          | Element | Mean Bottom<br>below 76 cm | dev sta | Mean upper<br>76 cm | dev sta | Mean whole<br>core | dev sta |
|--------------------------|---------|----------------------------|---------|---------------------|---------|--------------------|---------|
| <b>C1</b>                | Co      | 10,7                       | 3,7     | 13,1                | 2,2     | 12,7               | 2,6     |
|                          | Ni      | 109,0                      | 10,9    | 99,1                | 12,8    | 100,7              | 13,0    |
|                          | P       | 1497,8                     | 77,3    | 1723,6              | 304,7   | 1686,6             | 292,2   |
|                          | Pb      | 13,5                       | 2,6     | 18,6                | 2,8     | 17,8               | 3,3     |
|                          | Cr      | 144,1                      | 10,2    | 131,3               | 13,7    | 133,4              | 14,0    |
|                          | Cu      | 24,4                       | 8,4     | 32,3                | 5,7     | 31,0               | 6,8     |
|                          | Ti      | 406,8                      | 65,2    | 317,4               | 70,3    | 332,0              | 76,6    |
|                          | Zn      | 87,2                       | 19,4    | 97,8                | 28,6    | 96,0               | 27,5    |
|                          | Mn      | 781,0                      | 64,4    | 829,6               | 105,5   | 821,7              | 101,1   |
|                          | V       | 73,2                       | 8,6     | 77,0                | 11,5    | 76,4               | 11,1    |
| <b>C2</b>                | Co      | 20,5                       | 1,5     | 19,6                | 4,4     | 19,8               | 4,0     |
|                          | Ni      | 117,4                      | 6,7     | 101,3               | 25,1    | 104,8              | 23,3    |
|                          | P       | 2310,9                     | 119,9   | 2448,7              | 223,8   | 2419,0             | 212,8   |
|                          | Pb      | 19,6                       | 1,3     | 22,6                | 2,8     | 22,0               | 2,8     |
|                          | Cr      | 183,4                      | 17,2    | 158,8               | 39,8    | 164,1              | 37,5    |
|                          | Cu      | 25,2                       | 1,9     | 24,2                | 2,7     | 24,4               | 2,6     |
|                          | Ti      | 514,4                      | 118,0   | 446,9               | 121,2   | 461,8              | 122,8   |
|                          | Zn      | 115,2                      | 8,5     | 111,9               | 21,6    | 112,6              | 19,5    |
|                          | Mn      | 815,7                      | 117,6   | 1312,5              | 388,9   | 1205,5             | 404,1   |
|                          | V       | 98,3                       | 11,6    | 93,2                | 15,8    | 94,3               | 15,1    |
| <b>C3</b>                | Co      | 4,9                        | 3,5     | 8,8                 | 4,0     | 7,9                | 4,2     |
|                          | Ni      | 71,9                       | 6,6     | 80,8                | 11,0    | 78,6               | 10,7    |
|                          | P       | 1277,8                     | 183,8   | 1323,3              | 155,6   | 1311,2             | 161,9   |
|                          | Pb      | 9,4                        | 1,9     | 14,2                | 2,3     | 13,0               | 3,0     |
|                          | Cr      | 90,8                       | 13,9    | 111,6               | 19,7    | 106,4              | 20,4    |
|                          | Cu      | 13,0                       | 2,0     | 19,6                | 3,0     | 18,0               | 4,0     |
|                          | Ti      | 307,2                      | 63,7    | 356,2               | 121,8   | 343,3              | 110,7   |
|                          | Zn      | 58,6                       | 9,2     | 86,9                | 37,3    | 79,8               | 34,8    |
|                          | Mn      | 709,6                      | 58,4    | 730,8               | 111,0   | 725,5              | 100,1   |
|                          | V       | 47,1                       | 7,9     | 69,7                | 13,4    | 64,1               | 15,7    |
| <b>Current<br/>State</b> | Co      | 7,7                        | 3,7     |                     |         |                    |         |
|                          | Ni      | 76,6                       | 16,2    |                     |         |                    |         |
|                          | P       | 418,6                      | 79,1    |                     |         |                    |         |
|                          | Pb      | 18,8                       | 3,0     |                     |         |                    |         |
|                          | Cr      | 100,0                      | 27,6    |                     |         |                    |         |
|                          | Cu      | 18,2                       | 4,1     |                     |         |                    |         |
|                          | Ti      | 292,5                      | 104,4   |                     |         |                    |         |
|                          | Zn      | 78,5                       | 13,1    |                     |         |                    |         |
|                          | Mn      | 1063,9                     | 303,9   |                     |         |                    |         |
|                          | V       | 53,3                       | 17,6    |                     |         |                    |         |

Table SM3: Average, maximum and minimum concentrations (unit mg/Kg) for the whole sediment cores (C1,C2,C3), average of the anthropized (upper) and average of the pristine (bottom) section are reported.

- 82 12(3):388. doi:<https://doi.org/10.3390/atmos12030388>
- 83 Bertinetti S, Bolea-Fernandez E, Malandrino M, et al (2022) Strontium iso-
- 84 topic analysis of environmental microsamples by inductively coupled
- 85 plasma – tandem mass spectrometry. Journal of Analytical Atomic
- 86 Spectrometry 37(1):103–113. doi:<https://doi.org/10.1039/D1JA00329A>



Table SM4: Principal component analysis on C2 core, by euclidean distance and complete method. The principal component values major are highlighted in each column.

| Element                | Component  |            |            |
|------------------------|------------|------------|------------|
|                        | <b>PC1</b> | <b>PC2</b> | <b>PC3</b> |
| Mn                     | -0.276     | 0.203      | 0.351      |
| Fe                     | 0.192      | 0.106      | 0.498      |
| Al                     | 0.246      | -0.366     | 0.384      |
| V                      | 0.357      | -0.164     | 0.150      |
| Co                     | 0.356      | 0.238      | -0.032     |
| Ni                     | 0.351      | 0.200      | -0.166     |
| Pb                     | 0.153      | 0.503      | 0.310      |
| Cr                     | 0.378      | 0.018      | -0.030     |
| Cu                     | 0.014      | -0.405     | -0.075     |
| Ti                     | 0.248      | -0.419     | 0.191      |
| Zn                     | 0.355      | 0.194      | -0.011     |
| P                      | -0.168     | -0.175     | 0.435      |
| PAHs                   | -0.256     | 0.169      | 0.318      |
| Proportion of Variance | 0.522      | 0.146      | 0.128      |
| Cumulative Proportion  | 0.522      | 0.667      | 0.796      |

- 87 Marchegiano M, Francke A, Gliozzi E, et al (2018) Arid and humid phases  
88 in central Italy during the Late Pleistocene revealed by the Lake Trasi-  
89 meno ostracod record. *Palaeogeography, Palaeoclimatology, Palaeoecol-*  
90 *ogy* 490:55–69. doi:<https://doi.org/10.1016/j.palaeo.2017.09.033>
- 91 Vanhaecke F, Balcaen L, Malinovsky D (2009) Use of single-collector and  
92 multi-collector ICP-mass spectrometry for isotopic analysis. *Journal of*  
93 *Analytical Atomic Spectrometry* 24(7):863. doi:[https://doi.org/10.1039/](https://doi.org/10.1039/b903887f)  
94 [b903887f](https://doi.org/10.1039/b903887f)

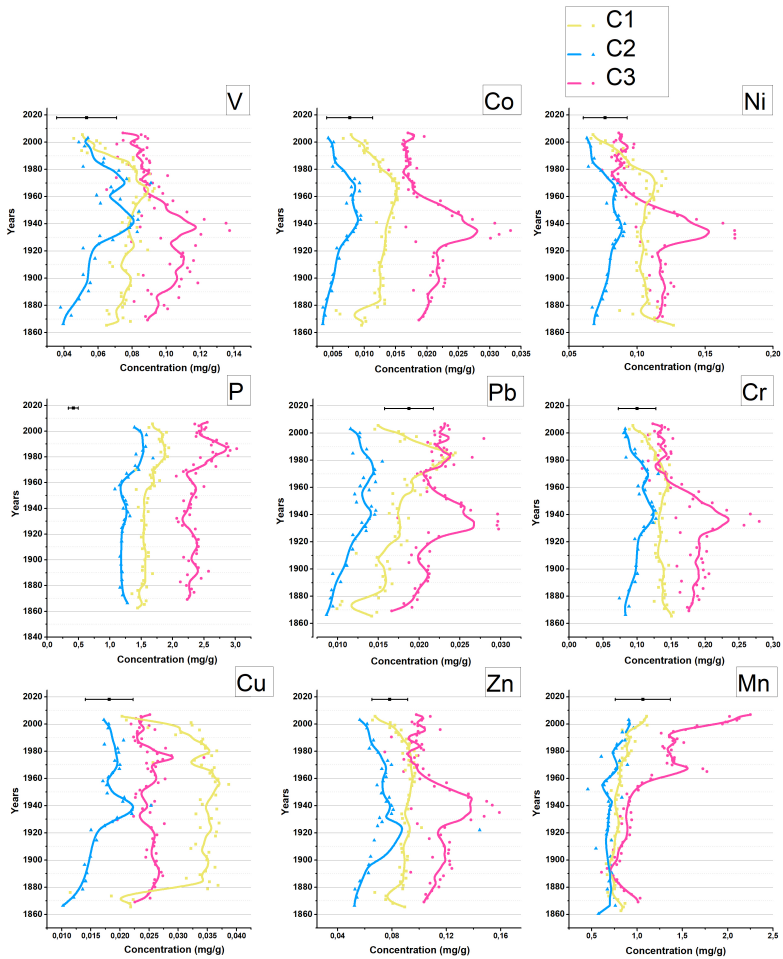

Fig. SM3: Trace element concentration trends (V, Co, Ni, P, Pb, Cr, Cu, Zn and Mn) in the three sediment cores: C1 (yellow), C2 (pink), C3 (blue) (adjacent-averaging method, with weighted average options was used on 5 points to obtain the trends line). The scatter represent single samples analysed and the line represents moving averages every 5 years. The black square represents the current concentration in the surface sediments (corresponding to 2018) and the error bar represents standard deviation.

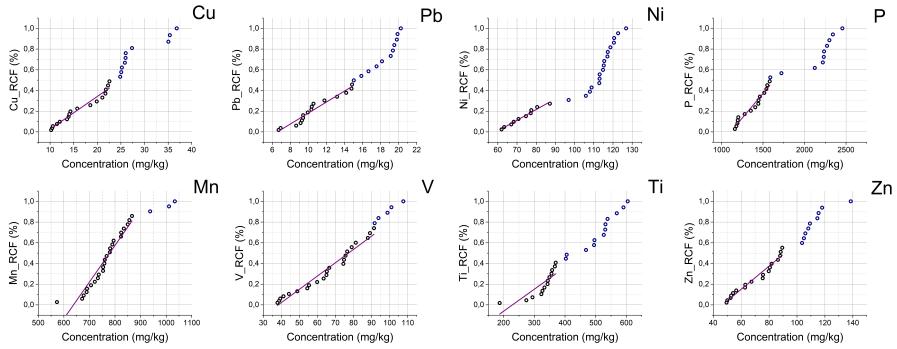

Fig. SM4: Cumulative frequency curves (scatters) of Cu, Pb, Ni, P, Mn, V, Ti and Zn. Linear regressions were performed on the cumulative frequency curve with  $p < 0.01$  and  $R^2 > 0.9$  (purple line).

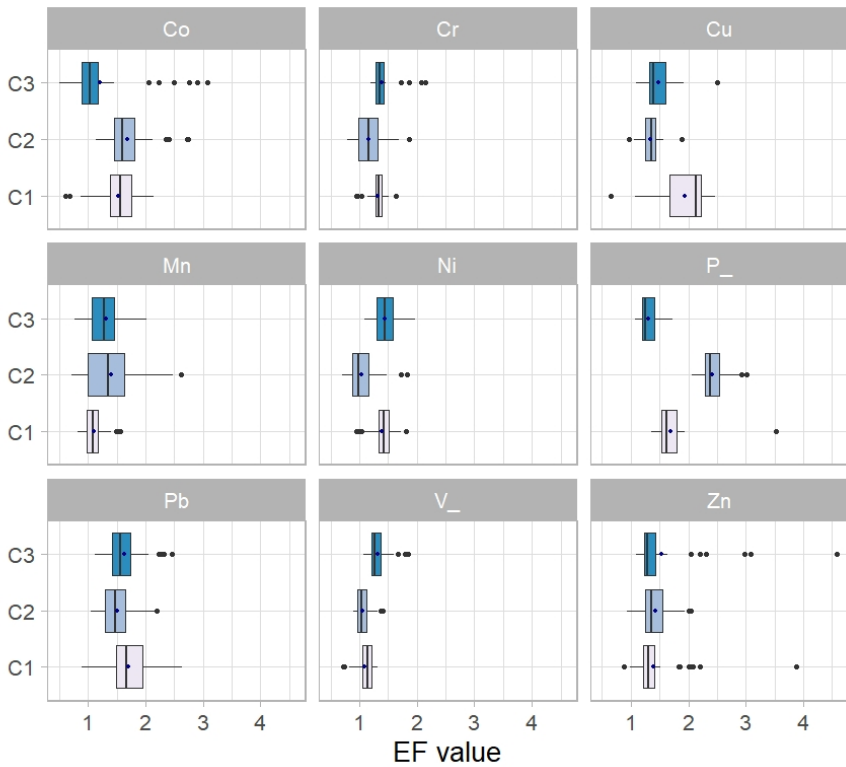

Fig. SM5: Boxplot of Enrichment factor for trace elements calculated for the 3 sediment cores. The mean values are represented by blue point.

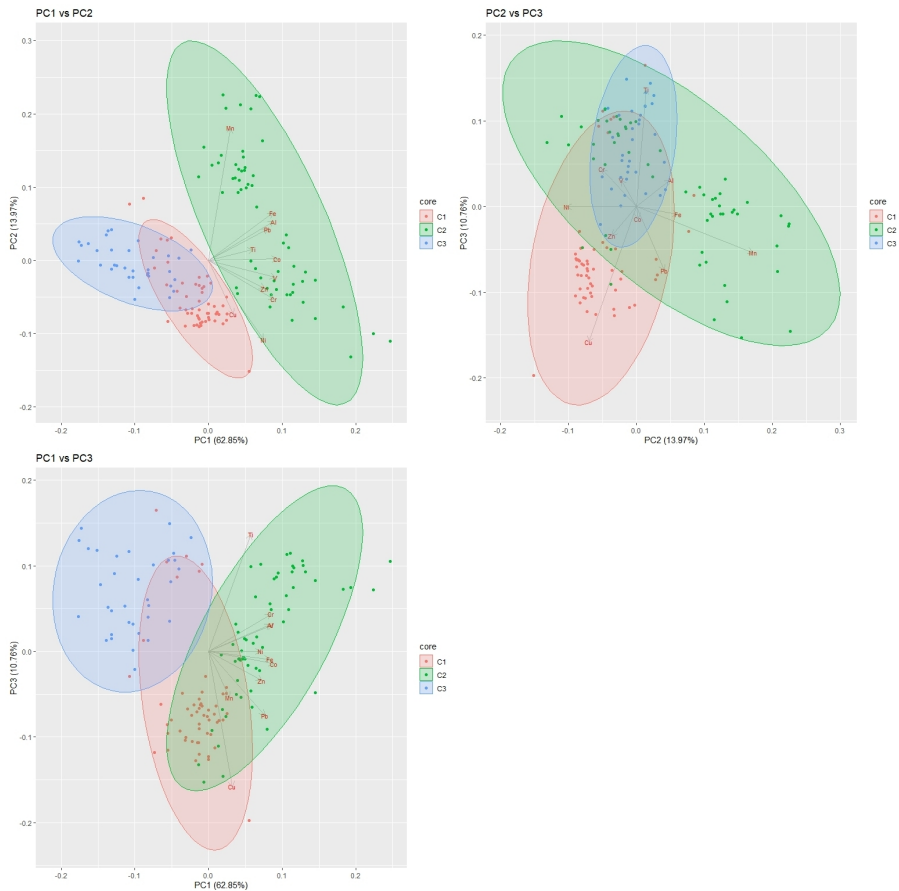

Fig. SM6: The graphs of the different principal components obtained through PCA implemented on the whole dataset of the 3 cores are reported, in order to observe the influence of the sampling site (C1,C2,C3).

Cluster Dendrogram C2

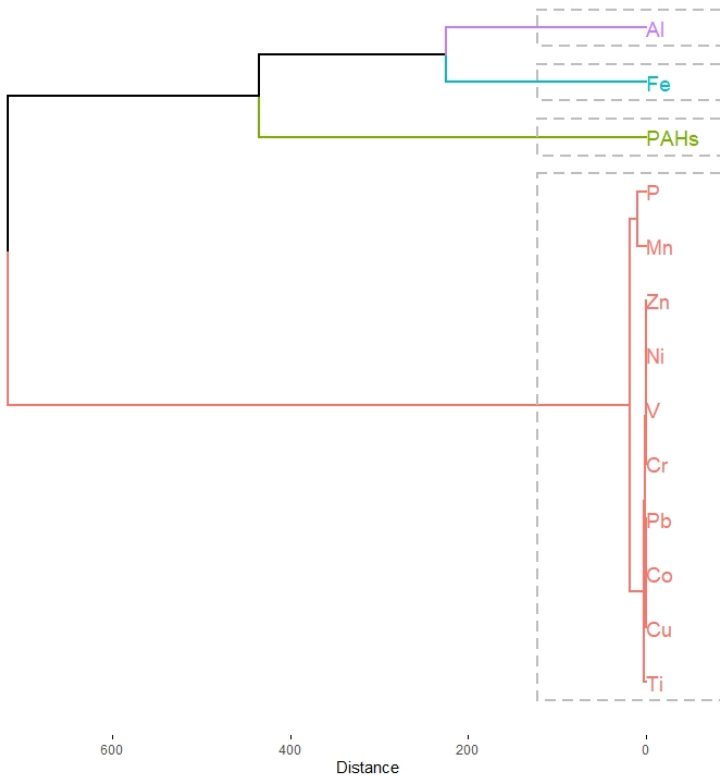

Fig. SM7: Hierarchical graph obtained with the cluster analysis for core C2 is shown. Al and Fe are grouped by the purple and blue boxes, PAHs by the green box, the other anthropogenic elements are grouped by the pink box, but Mn and P are indicated by a separate subgroup.

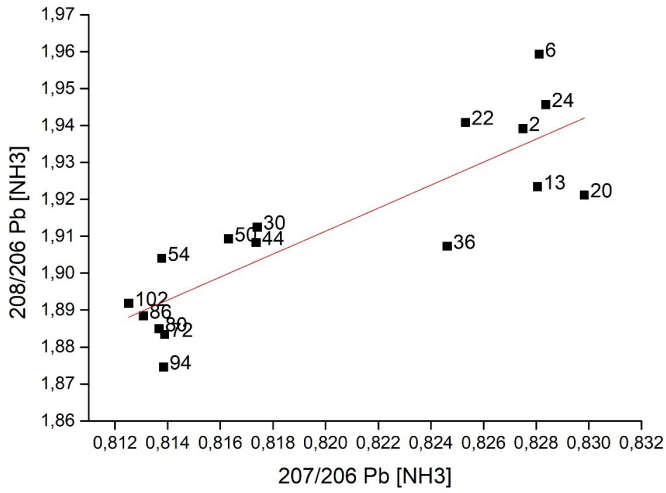

Fig. SM8:  $^{208}\text{Pb}/^{206}\text{Pb}$  vs.  $^{207}\text{Pb}/^{206}\text{Pb}$ ; the labels correspond to the sample number.
